# Supplementary material for: Vinyl monomers bearing a sulfonyl(trifluoromethane sulfonyl) imide group: synthesis and polymerization using nitroxide-mediated polymerization
Source: Royal Society of Chemistry journal article supplement (doi:10.1039/c6py01004k), 2016-01-01

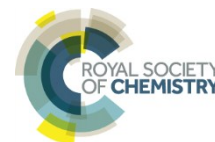

**Supporting information**

**Vinyl Monomers bearing Sulfonyl(trifluoromethane sulfonyl) imide group: Synthesis and polymerization using Nitroxide-Mediated Polymerization**

Trang N. T. Phan<sup>a\*</sup>, Adèle Ferrand<sup>a</sup>, Hien The Ho<sup>a</sup>, Livie Liénafa<sup>a</sup>, Marion Rollet<sup>a</sup>, Sébastien Maria<sup>a</sup>, Renaud Bouchet<sup>b</sup>, Didier Gigmes<sup>a</sup>

<sup>a</sup>Aix-Marseille Université, CNRS, ICR UMR-7273, CROPS, 13397, Marseille, France

<sup>b</sup>LEPMI UMR-5279 CNRS—Grenoble INP—Univ. de Savoie—Univ. Joseph Fourier, 38402 St Martin d'Hères, France

**Figure S1.**  $^1\text{H}$  NMR spectrum in  $\text{DMSO-d}_6$  of lithium styrene-STFSI.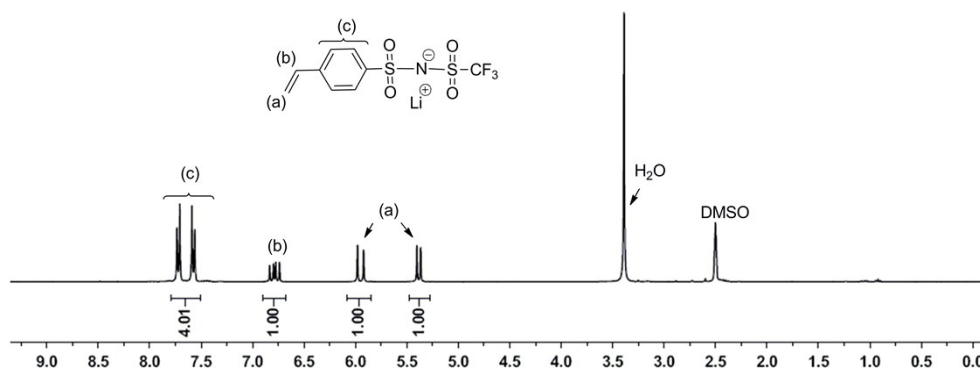**Figure S2.**  $^7\text{Li}$  NMR spectrum in  $\text{DMSO-d}_6$  of lithium styrene-STFSI.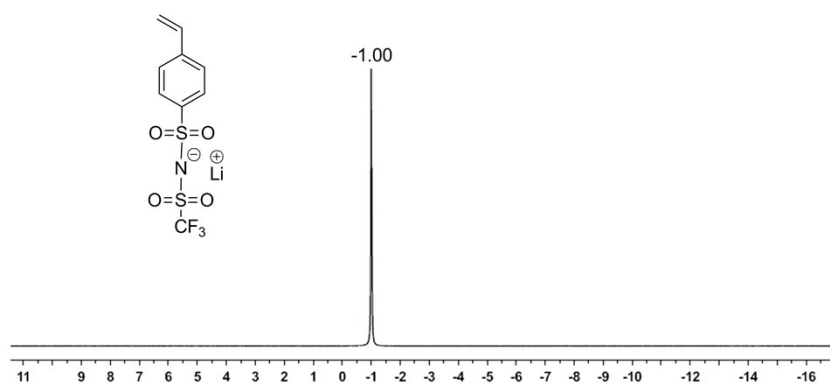**Figure S3.**  $^{13}\text{C}$  NMR spectrum in  $\text{DMSO-d}_6$  of lithium styrene-STFSI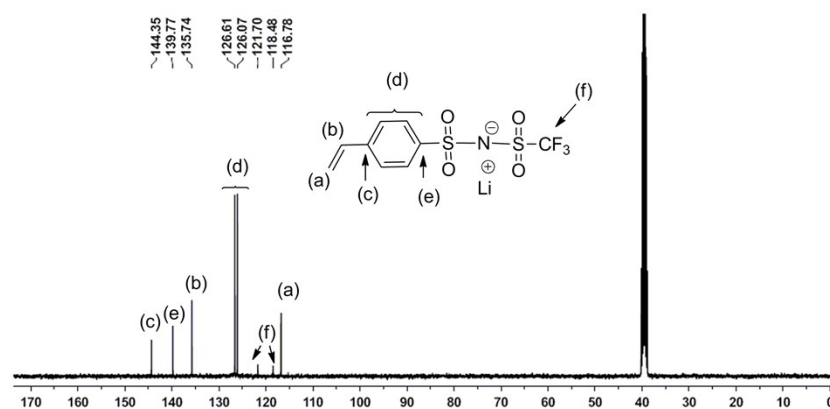

**Figure S4.**  $^{19}\text{F}$  NMR spectra in  $\text{DMSO-d}_6$  for trifluoromethylsulfonamide (top), potassium 3-sulfonyl (trifluoromethylsulfonyl)imide propyl acrylate (middle) and potassium 3-sulfonyl (trifluoromethylsulfonyl)imide propyl methacrylate (bottom).

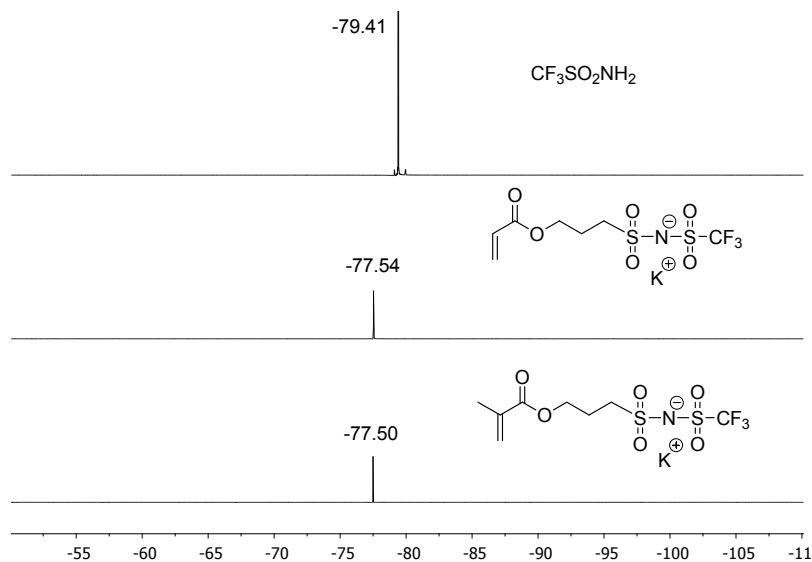

**Figure S5.**  $^1\text{H}$  NMR spectrum in  $\text{DMSO-d}_6$  of MASTFSIK monomer.

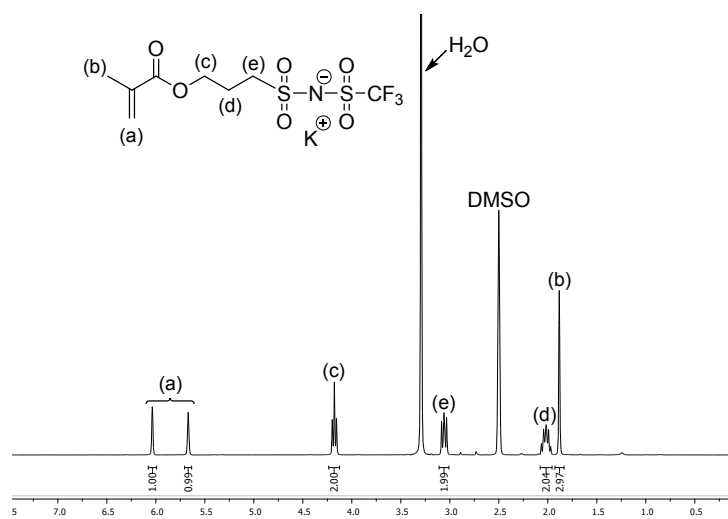

**Figure S6.**  $^{13}\text{C}$  NMR spectrum in  $\text{DMSO-d}_6$  of MASTFSIK monomer.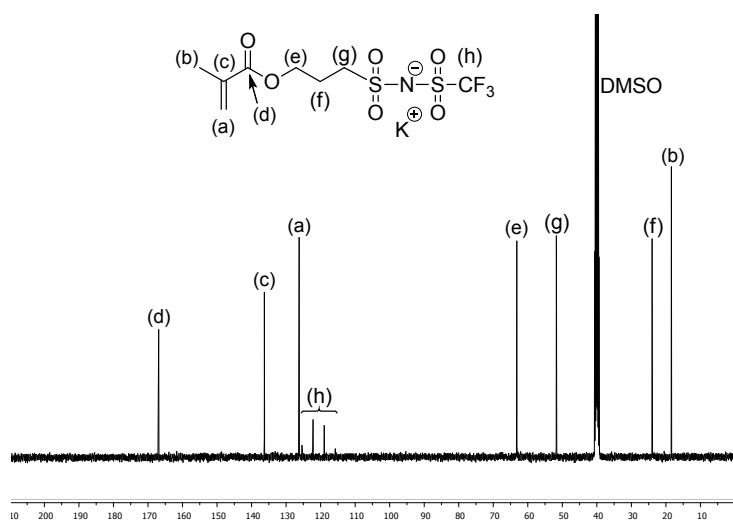**Figure S7.**  $^1\text{H}$  NMR spectrum in  $\text{DMSO-d}_6$  of ASTFSIK monomer.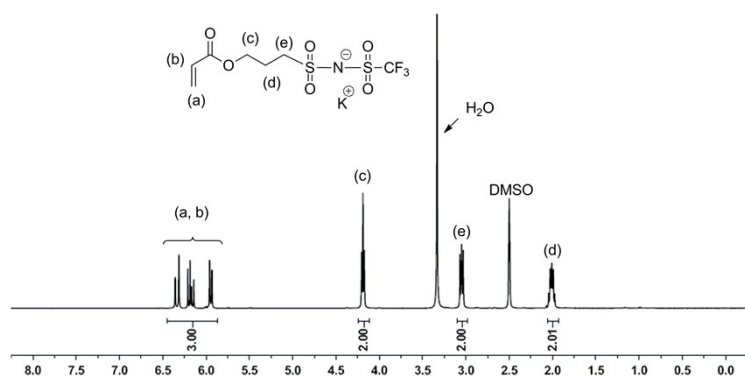**Figure S8.**  $^{13}\text{C}$  NMR spectrum in  $\text{DMSO-d}_6$  of ASTFSIK monomer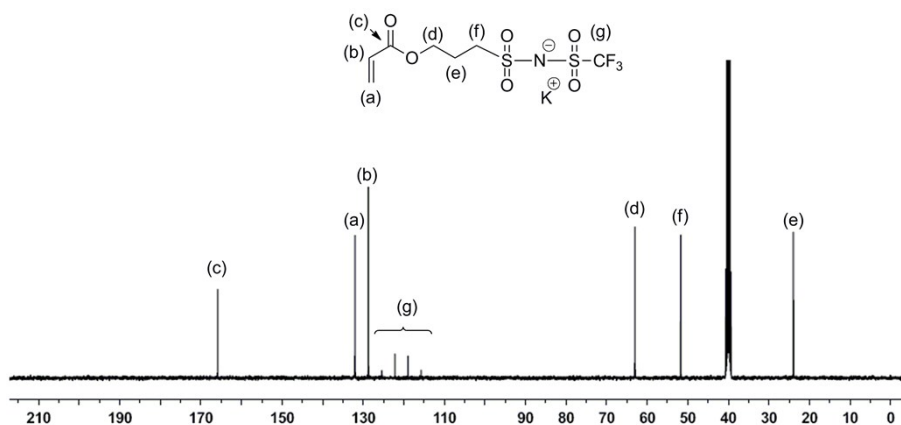

**Figure S9.** Nitroxide-mediated copolymerization of potassium methacrylate-STFSI and potassium styrene-STFSI in water solution at 65°C using sodium MAMA-SG1 as initiator, in the presence of 10 mol% of free SG1. Experimental conditions: monomers content of 20 wt% in water, target  $M_n$  of 30 000 g mol<sup>-1</sup> and initial molar fraction of potassium styrene-STFSI was 0.2

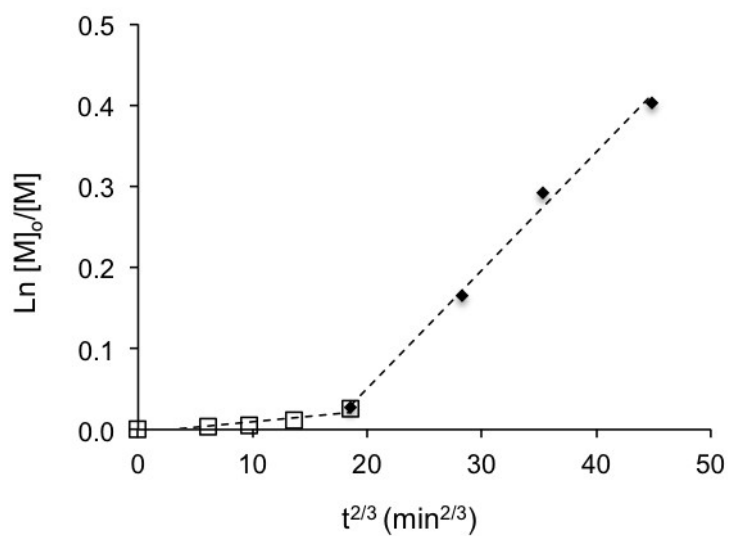

**Figure S10.** DSC traces for PSSTFSiLi and P(SSTFSiK-co-MASTFSiK) samples at heating rate of 10°C/min under nitrogen atmosphere.

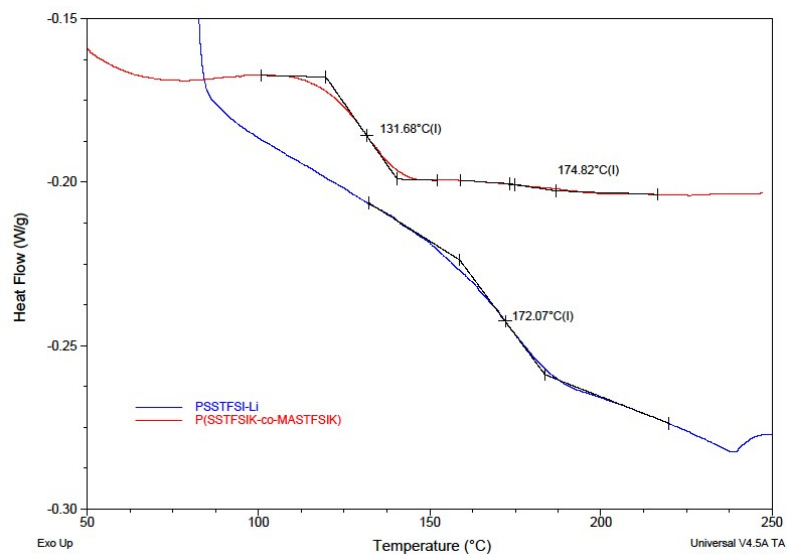

**Figure S11.** DSC trace for PASTFSiK sample at heating rate of 10°C/min under nitrogen atmosphere.

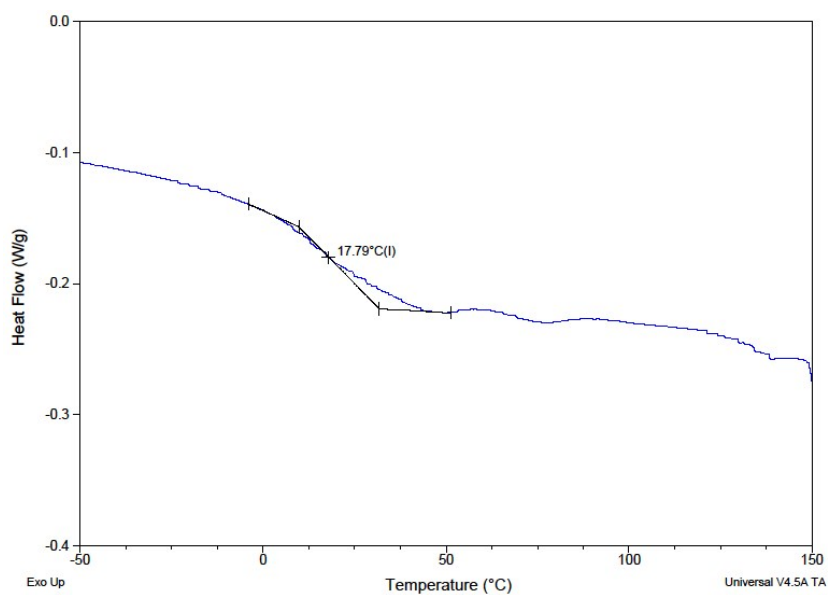

Supplement: c6py01004k1.pdf [file c6py01004k1.pdf]
